# Supplementary material for: Performance enhanced electromagnetic wave absorber from controllable modification of natural plant fiber
Source: Royal Society of Chemistry journal article supplement (doi:10.1039/c9ra02764e), 2019-01-01
Supplement: c9ra02764e1.pdf [file c9ra02764e1.pdf]

Supporting Information

**Performance Enhanced Electromagnetic Wave Absorber from Controllable  
Modification of Natural Plant Fiber**

Lin Guo<sup>a</sup>, Qing-Da An<sup>a,\*</sup>, Zuo-Yi Xiao<sup>a</sup>, Shang-Ru Zhai<sup>a,\*</sup>, Li Cui<sup>a</sup> and Zhong-Cheng Li<sup>b</sup>

*<sup>a</sup>Faculty of Light Industry and Chemical Engineering, Dalian Polytechnic University, Dalian  
116034, P.R. China*

*<sup>b</sup>Key Laboratory of Optic-electric Sensing and Analytical Chemistry for Life Science, MOE,  
College of Chemistry and Molecular Engineering, Qingdao University of Science and Technology,  
Qingdao 266042, P.R. China*

\*Corresponding authors:

E-mail: [anqingdachem@163.com](mailto:anqingdachem@163.com) (Q.-D. An);

[zhairschem@163.com](mailto:zhairschem@163.com) (S.-R. Zhai)

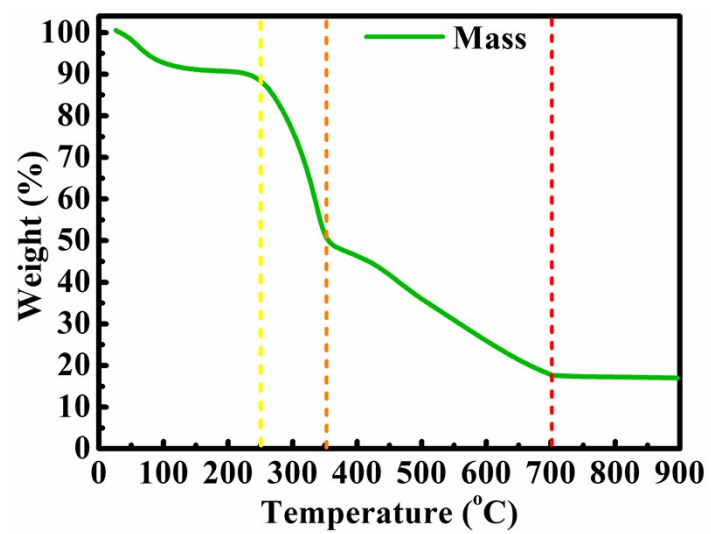

Fig. S1 TG curve of natural sisal fiber.

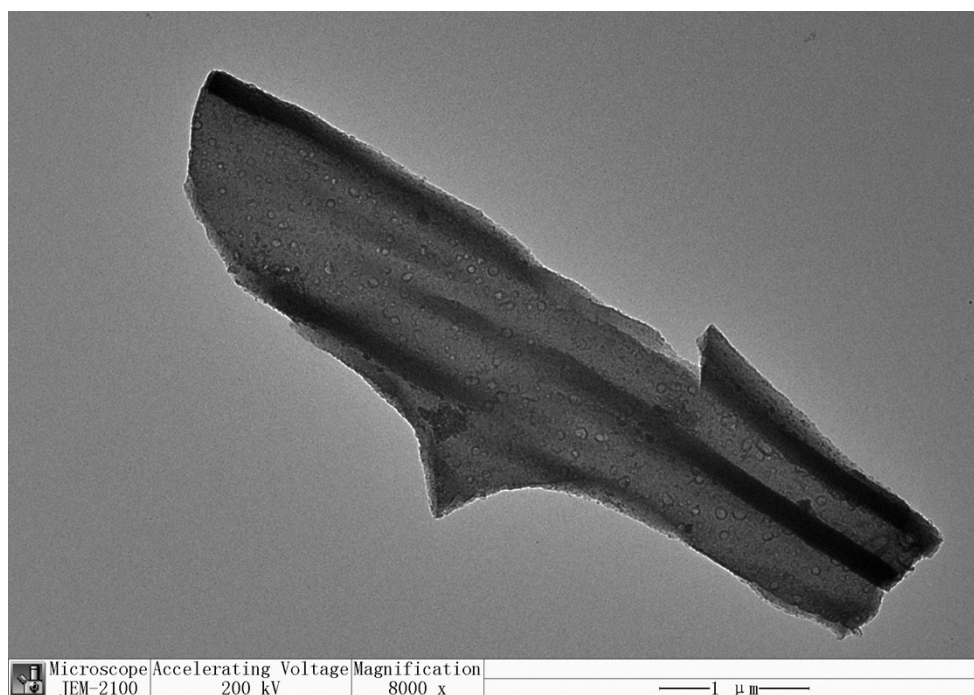

**Fig. S2** PCR TEM image.

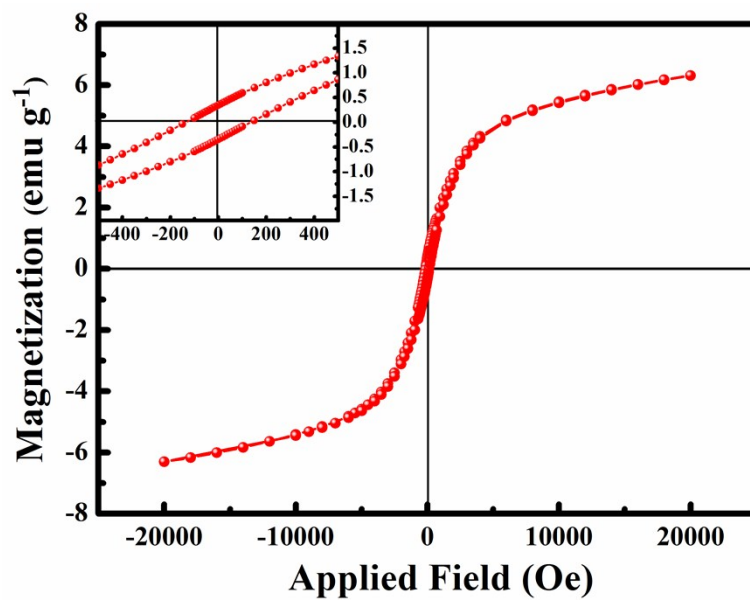

Fig. S3 Magnetization curve of FCR (inset: amplification part).

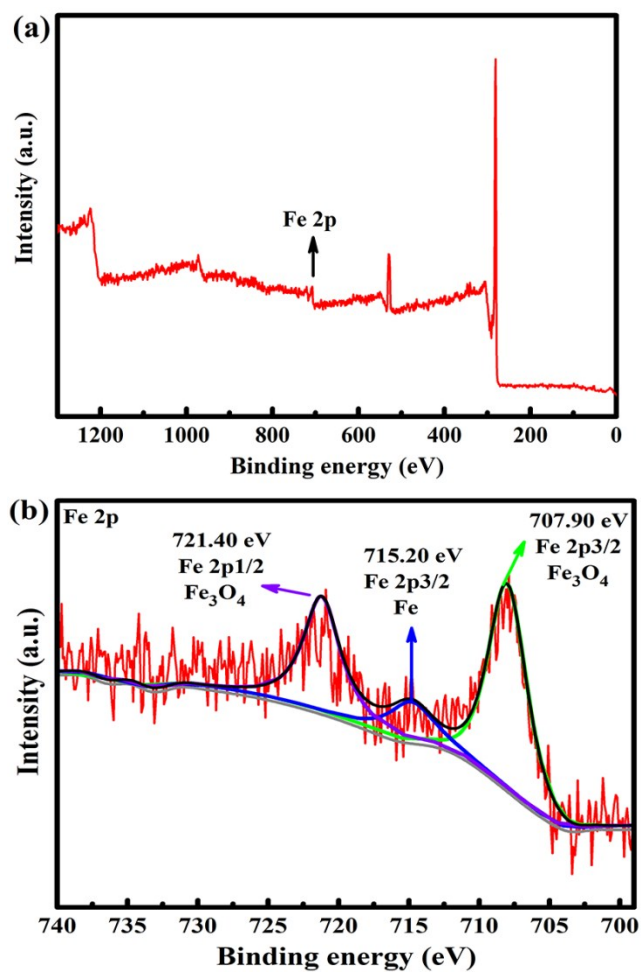

Fig. S4 XPS spectra of FCR (wide-scan spectra (a), Fe 2p spectrum (b)).

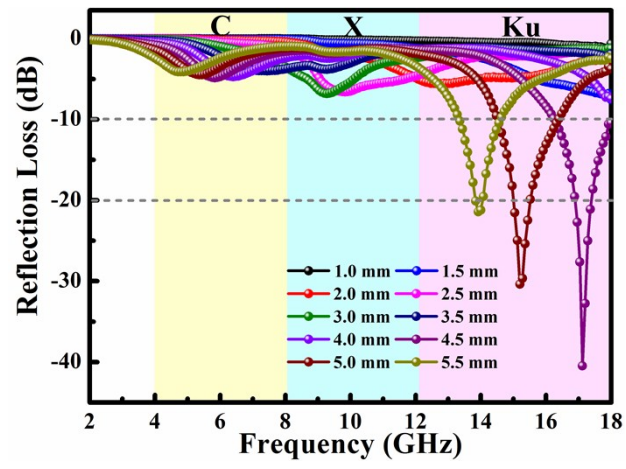

Fig. S5 RL curves of PCR.
